# Supplementary material for: Recent progress in surface-enhanced Raman spectroscopy-based biosensors for the detection of extracellular vesicles
Source: Royal Society of Chemistry journal article supplement (doi:10.1039/d2ay01339h), 2022-01-01
Supplement: d2ay01339h1.pdf [file d2ay01339h1.pdf]

# Recent progress in surface-enhanced Raman spectroscopy-based biosensors for the detection of extracellular vesicles

Hong Zheng<sup>#a</sup>, Qin Ding<sup>#b</sup>, Chen Li<sup>a</sup>, Wei Chen<sup>a</sup>, Xiaoqiang Chen<sup>a</sup>, Qin Lin<sup>a</sup>, Desheng Wang<sup>\*a</sup>,  
Youliang Weng<sup>+b</sup> and Duo Lin<sup>+b</sup>

<sup>a</sup> Department of Otolaryngology Head and Neck Surgery, Fujian Medical University Union Hospital, Fuzhou, China

<sup>b</sup> Clinical Oncology School of Fujian Medical University, Fujian Cancer Hospital, Fuzhou, Fujian, China

<sup>c</sup> Key Laboratory of OptoElectronic Science and Technology for Medicine, Ministry of Education, Fujian Provincial Key Laboratory for Photonics Technology, Fujian Normal University, Fuzhou, China

**Table S1.** peak assignments of surface-enhanced Raman spectroscopy of cell-derived EVs

| Peak (cm <sup>-1</sup> ) | Origin                                                         | EVs source                                                                                          | Substrates                                                                                                                                                       |
|--------------------------|----------------------------------------------------------------|-----------------------------------------------------------------------------------------------------|------------------------------------------------------------------------------------------------------------------------------------------------------------------|
| 406                      | cholesterol                                                    | RBC                                                                                                 | EVs with Au@AgNPs <sup>1</sup>                                                                                                                                   |
| 486,487                  | Polysaccharide                                                 | B16F10(melanoma cell), RBC<br>normal cell(alveolar cell)                                            | EVs coated with AuNP <sup>2</sup><br>GNP substrates <sup>3</sup>                                                                                                 |
| 505,521                  | S-S stretching(proteins)                                       | H1975(lung cancer cell)<br>B16F10(melanoma cell), RBC                                               | Ag NCs on Au NR array substrate <sup>4</sup><br>EVs with Au@AgNPs <sup>1</sup><br>EVs coated with AuNP <sup>2</sup>                                              |
| 537                      | Cholesterol ester, Adenosine, S-S difulfide dridge in cysteine | normal cell(alveolar cell)<br>Lung cancer cell<br>HPAEpiC(normal cell)                              | GNP substrates <sup>3, 5</sup>                                                                                                                                   |
| 546                      | cholesterol                                                    | B16F10(melanoma cell), RBC                                                                          | EVs with Au@AgNPs <sup>1</sup><br>EVs coated with AuNP <sup>2</sup>                                                                                              |
| 570                      | Carbohydrate present in cell membrane                          | H1299, H522(lung cancer cells)                                                                      | GNP substrates <sup>3</sup>                                                                                                                                      |
| 602                      | CCO                                                            | H1299, H522(lung cancer cells)                                                                      | GNP substrates <sup>3</sup>                                                                                                                                      |
| 615,625,630              | C - C twisting(proteins)                                       | SKOV-3(ovarian cancer cell)<br>NL-20, BEAS-20, L929(lung normal cells)<br>PC-9(lung cancer cell)    | 3D plasmonic nanobowl platform <sup>6</sup><br>Ag NCs on Au NR array substrate <sup>4</sup>                                                                      |
| 643,645,647,648          | C - C twisting(Tyr)                                            | SKOV-3(ovarian cancer cell)<br>B16F10(melanoma cell), RBC<br>Lung cancer cell, HPAEpiC(normal cell) | biosilica/AgNP composite substrates <sup>7</sup><br>3D plasmonic nanobowl platform <sup>6</sup><br>EVs with Au@AgNPs <sup>1</sup><br>GNP substrates <sup>5</sup> |
| 650                      | C-S stretching                                                 | SKOV-3(ovarian cancer cell)                                                                         | biosilica/AgNP composite substrates <sup>7</sup>                                                                                                                 |
| 667                      | N - type sugar pucker                                          | PANC1(Pancreatic cancer cell)                                                                       | EVs with nanostars <sup>8</sup>                                                                                                                                  |
| 668                      | T, G (DNA/RNA)                                                 | B16F10(melanoma cell), RBC                                                                          | EVs with Au@AgNPs <sup>1</sup>                                                                                                                                   |
| 700                      | Cholesterol, cholesterol ester, C-S stretching mode            | normal cell(alveolar cell)                                                                          | GNP substrates <sup>3</sup>                                                                                                                                      |

|                      |                                                                             |                                                                                                                                             |                                                                                                                                                 |
|----------------------|-----------------------------------------------------------------------------|---------------------------------------------------------------------------------------------------------------------------------------------|-------------------------------------------------------------------------------------------------------------------------------------------------|
| 707                  | Aminoacid, lipid band due to cholesterol                                    | SKOV-3(ovarian cancer cell)<br>B16F10(melanoma cell), RBC<br>MDA-MB-231(breast cancer cell)                                                 | 3D plasmonic nanobowl platform <sup>6</sup><br>EVs with Au@AgNPs <sup>1</sup><br>GO-GNS mixed-dimensional substrate <sup>9</sup>                |
| 714,725,727, 729,732 | Met, Adenine, Ser                                                           | normal cell<br>SKOV-3(ovarian cancer cell)<br>PANC1(Pancreatic cancer cell)<br>H1299, H522(lung cancer cells)                               | GNP substrates <sup>3</sup><br>3D plasmonic nanobowl platform <sup>6</sup><br>EVs with nanostars <sup>8</sup>                                   |
| 735                  | C–S stretching                                                              | SKOV-3(ovarian cancer cell)                                                                                                                 | biosilica/AgNP composite substrates <sup>7</sup>                                                                                                |
| 754,760              | Trp                                                                         | PANC1(Pancreatic cancer cell)<br>SKOV-3(ovarian cancer cell)                                                                                | EVs with nanostars <sup>8</sup><br>3D plasmonic nanobowl platform <sup>6</sup>                                                                  |
| 781,786,788          | Cytosine ring breathing mode, DNA backbone phosphodiester symmetric stretch | H1299, H522(lung cancer cells)<br>SKOV-3(ovarian cancer cell)<br>B16F10(melanoma cell), RBC<br>PANC1(Pancreatic cancer cell)<br>normal cell | GNP substrates <sup>3</sup><br>3D plasmonic nanobowl platform <sup>6</sup><br>EVs with Au@AgNPs <sup>1</sup><br>EVs with nanostars <sup>8</sup> |
| 789-795              | vibrations in nucleic acid                                                  | SKOV-3(ovarian cancer cell)                                                                                                                 | biosilica/AgNP composite substrates <sup>7</sup>                                                                                                |
| 805                  | Si–O stretching, predominantly silicon motion                               | SKOV-3(ovarian cancer cell)                                                                                                                 | biosilica/AgNP composite substrates <sup>7</sup>                                                                                                |
| 813,819              | Ribose                                                                      | Lung cancer cell<br>HPAEpiC(normal cell)                                                                                                    | GNP substrates <sup>5</sup>                                                                                                                     |
| 830,831              | Tyr                                                                         | SKOV-3(ovarian cancer cell)<br>Lung cancer cell                                                                                             | 3D plasmonic nanobowl platform <sup>6</sup><br>GNP substrates <sup>5</sup>                                                                      |
| 838                  | Amine group                                                                 | H1299, H522(lung cancer cells)                                                                                                              | GNP substrates <sup>3</sup>                                                                                                                     |
| 843                  | Glucose                                                                     | H1299, H522(lung cancer cells)                                                                                                              | GNP substrates <sup>3</sup>                                                                                                                     |

|                 |                                                                 |                                                                                                          |                                                                                                                       |
|-----------------|-----------------------------------------------------------------|----------------------------------------------------------------------------------------------------------|-----------------------------------------------------------------------------------------------------------------------|
| 847.4           | Monosaccharides( $\alpha$ -glucose, (C-O-C) skeletal mode       | H1975(lung cancer cell)                                                                                  | Au nanopyramid hybrid substrate <sup>10</sup>                                                                         |
| 850             | lipids,t(C – C) vibration                                       | CCD841-CoN(normal cell)<br>HCT116(Colon cancer cell)                                                     | Super-hydrophobic substrate <sup>11</sup>                                                                             |
| 852,854.4       | Ring breathing Tyr (proteins)                                   | SKOV-3(ovarian cancer cell)<br>HCC827(lung cancer cell)                                                  | 3D plasmonic nanobowl platform <sup>6</sup><br>Au nanopyramid hybrid substrate <sup>10</sup>                          |
| 869             | Pro                                                             | H1299, H522(lung cancer cells)                                                                           | GNP substrates <sup>3</sup>                                                                                           |
| 871             | Tyr                                                             | Lung cancer cell<br>HPAEpiC(normal cell)                                                                 | GNP substrates <sup>5</sup>                                                                                           |
| 879             | Trp                                                             | SKOV-3(ovarian cancer cell)                                                                              | 3D plasmonic nanobowl platform <sup>6</sup>                                                                           |
| 883             | $\rho$ (CH <sub>2</sub> )(protein)                              | B16F10(melanoma cell)                                                                                    | EVs coated with AuNP <sup>2</sup>                                                                                     |
| 903             | carbohydrate-related SERS vibrations                            | SKOV-3(ovarian cancer cell)                                                                              | biosilica/AgNP composite substrates <sup>7</sup>                                                                      |
| 911             | Glucose, Ring breathing mode                                    | H1299, H522(lung cancer cells)                                                                           | GNP substrates <sup>3</sup>                                                                                           |
| 920             | Protein                                                         | SKOV-3(ovarian cancer cell)                                                                              | 3D plasmonic nanobowl platform <sup>6</sup>                                                                           |
| 925,927,931     | Pro, Val                                                        | Lung cancer cell<br>HPAEpiC(normal cell)<br>SKOV-3(ovarian cancer cell)                                  | GNP substrates <sup>5</sup><br>biosilica/AgNP<br>composite substrates <sup>7</sup>                                    |
| 937             | Protein                                                         | SKOV-3(ovarian cancer cell)                                                                              | 3D plasmonic nanobowl platform <sup>6</sup>                                                                           |
| 942,944,948,960 | C – C – N stretching (e.g. $\alpha$ -helix backbone in protein) | Lung cancer cell<br>HPAEpiC(normal cell)<br>PANC1(Pancreatic cancer cell)<br>SKOV-3(ovarian cancer cell) | GNP substrates <sup>5</sup><br>EVs with nanostars <sup>8</sup><br>biosilica/AgNP<br>composite substrates <sup>7</sup> |
| 970             | lipid band due to Phosphate monoester groups                    | MDA-MB-231(breast cancer cell)                                                                           | GO-GNS mixed-dimensional substrate <sup>9</sup>                                                                       |
| 1000,1003       | Phe                                                             | SKOV-3(ovarian cancer cell)<br>H1975(lung cancer cell)                                                   | 3D plasmonic nanobowl platform <sup>6</sup><br>Ag NCs on Au NR array                                                  |

|                       |                                                                                    |                                                                                                                             |                                                                                                                                                                |
|-----------------------|------------------------------------------------------------------------------------|-----------------------------------------------------------------------------------------------------------------------------|----------------------------------------------------------------------------------------------------------------------------------------------------------------|
|                       |                                                                                    | cell)                                                                                                                       | substrate <sup>4</sup>                                                                                                                                         |
|                       |                                                                                    | PANC1(Pancreatic cancer cell)                                                                                               | EVs with nanostars <sup>8</sup><br>EVs with Au@AgNPs <sup>1</sup>                                                                                              |
| 1010,1050,1090        | Si-O stretching; oxygen vibrating between silicon in the Si-O-Si bond              | RBC<br>SKOV-3(ovarian cancer cell)                                                                                          | biosilica/AgNP composite substrates <sup>7</sup>                                                                                                               |
| 1014                  | tryptophan band due to the ring breathing                                          | SK-BR3(breast cancer cell)                                                                                                  | GO-GNS mixed-dimensional substrate <sup>9</sup>                                                                                                                |
| 1015                  | C-C stretching vibration possibly coupled to C-N stretching vibration              | SKOV-3(ovarian cancer cell)                                                                                                 | biosilica/AgNP composite substrates <sup>7</sup>                                                                                                               |
| 1016,1017             | Phe                                                                                | Lung cancer cell<br>HPAEpiC(normal cell)                                                                                    | GNP substrates <sup>5</sup>                                                                                                                                    |
| 1032,1033,1034.3,1038 | CH <sub>2</sub> CH <sub>3</sub> bending,t(C - C) vibration, Pro                    | B16F10(melanoma cell), RBC<br>CCD841-CoN,<br>HPAEpiC(normal cells)<br>HCC827(lung cancer cell)<br>HCT116(Colon cancer cell) | EVs coated with AuNP <sup>2</sup><br>GNP substrates <sup>5</sup><br>Au nanopyramid hybrid substrate <sup>10</sup><br>Super-hydrophobic substrate <sup>11</sup> |
| 1050                  | Lipid                                                                              | SKOV-3(ovarian cancer cell)                                                                                                 | 3D plasmonic nanobowl platform <sup>6</sup>                                                                                                                    |
| 1056                  | lipid band is due to C • • O stretch                                               | MDA-MB-231(breast cancer cell)                                                                                              | GO-GNS mixed-dimensional substrate <sup>9</sup>                                                                                                                |
| 1058,1059             | DNA bases                                                                          | Lung cancer cell,<br>HPAEpiC(normal cells)                                                                                  | GNP substrates <sup>5</sup>                                                                                                                                    |
| 1072                  | Mannose, C-N stretching mode                                                       | H1299, H522(lung cancer cells)                                                                                              | GNP substrates <sup>3</sup>                                                                                                                                    |
| 1095,1101             | PO <sub>2</sub> - stretching, C-C stretching, C-O-C stretching, glycosidic link in | SKOV-3(ovarian cancer cell)<br>SK-BR3(breast cancer cell)                                                                   | biosilica/AgNP composite substrates <sup>7</sup><br>GO-GNS mixed-dimensional substrate <sup>9</sup>                                                            |

---

| DNA/RNA                          |                                                                                            |                                                                                              |                                                                                                                                                                                       |
|----------------------------------|--------------------------------------------------------------------------------------------|----------------------------------------------------------------------------------------------|---------------------------------------------------------------------------------------------------------------------------------------------------------------------------------------|
| 1110,1113.6,1115,<br>1120,1120.3 | The strong C-O band of ribose (serves as a marker band for RNA in solutions), Nucleic acid | SKOV-3(ovarian cancer cell)<br>H1975, HCC827(lung cancer cell)<br>B16F10(melanoma cell), RBC | biosilica/AgNP composite substrates <sup>7</sup><br>Au nanopyramid hybrid substrate <sup>10</sup><br>EVs coated with AuNP <sup>2</sup><br>3D plasmonic nanobowl platform <sup>6</sup> |
| 1124,1134                        | t(C - C) inphase aliphatic C - C stretch of lipids                                         | CCD841-CoN(normal cell)<br>HCT116(Colon cancer cell)<br>B16F10(melanoma cell), RBC           | EVs coated with AuNP <sup>2</sup><br>Super-hydrophobic substrate <sup>11</sup><br>EVs coated with AuNP <sup>2</sup>                                                                   |
| 1145                             | CH <sub>2</sub> , CH <sub>3</sub> deformations in proteins and lipids                      | H1299, H522(lung cancer cells)                                                               | GNP substrates <sup>3</sup>                                                                                                                                                           |
| 1150                             | Deoxyribose phosphate backbone (C-C stretching mode), Adenosine, Thymine, Glycogen         | normal cell(alveolar cell)                                                                   | GNP substrates <sup>3</sup>                                                                                                                                                           |
| 1160-1170                        | carbohydrate-related SERS vibrations                                                       | SKOV-3(ovarian cancer cell)                                                                  | biosilica/AgNP composite substrates <sup>7</sup>                                                                                                                                      |
| 1172                             | $\delta$ (C H) (e.g., protein)                                                             | B16F10(melanoma cell), RBC                                                                   | EVs coated with AuNP <sup>2</sup>                                                                                                                                                     |
| 1175                             | Tyr, Phe                                                                                   | SKOV-3(ovarian cancer cell)                                                                  | 3D plasmonic nanobowl platform <sup>6</sup>                                                                                                                                           |
| 1175                             | nucleic acid vibrations in DNA/RNA, phenylalanine, or tyrosine vibrations in proteins      | SKOV-3(ovarian cancer cell)                                                                  | biosilica/AgNP composite substrates <sup>7</sup>                                                                                                                                      |
| 1179                             | $\nu$ (C-C) and $\nu$ (C-O) (phospholipids)                                                | B16F10(melanoma cell), RBC                                                                   | EVs with Au@AgNPs <sup>1</sup><br>EVs coated with AuNP <sup>2</sup>                                                                                                                   |

---

|                                     |                                                                                                                                                                        |                                                                                                                                                                                                    |                                                                                                                                                                                                                                                                                     |
|-------------------------------------|------------------------------------------------------------------------------------------------------------------------------------------------------------------------|----------------------------------------------------------------------------------------------------------------------------------------------------------------------------------------------------|-------------------------------------------------------------------------------------------------------------------------------------------------------------------------------------------------------------------------------------------------------------------------------------|
| 1198,1207,<br>1211,1213.5           | Tyr, Phe $\nu$ (C-C6H6)<br>mode, Stretching of<br>C-N                                                                                                                  | SK-BR3(breast cancer<br>cell)<br>SKOV-3(ovarian cancer<br>cell)<br>B16F10(melanoma<br>cell), RBC<br>HCC827, H1975(lung<br>cancer cells)<br>normal cell(alveolar<br>cell)                           | GO-GNS mixed-<br>dimensional substrate <sup>9</sup><br>3D plasmonic<br>nanobowl platform <sup>6</sup><br>EVs with Au@AgNP <sup>1</sup><br>Au nanopyramid<br>hybrid substrate <sup>10</sup><br>GNP substrates <sup>3</sup>                                                           |
| 1217,1222,<br>1238.4                | Amide III                                                                                                                                                              | HPAEpiC(normal cell)<br>HCC827(lung cancer<br>cell)                                                                                                                                                | GNP substrates <sup>5</sup><br>Au nanopyramid<br>hybrid substrate <sup>10</sup>                                                                                                                                                                                                     |
| 1235                                | ribonucleic acid<br>from Uraci                                                                                                                                         | CCD841-CoN(normal<br>cell)<br>HCT116(Colon cancer<br>cell)                                                                                                                                         | Super-hydrophobic<br>substrate <sup>11</sup>                                                                                                                                                                                                                                        |
| 1240                                | C-N stretching + N<br><br>-H deformation,<br><br>amide III in proteins                                                                                                 | SKOV-3(ovarian cancer<br>cell)                                                                                                                                                                     | biosilica/AgNP<br>composite substrates <sup>7</sup>                                                                                                                                                                                                                                 |
| 1243,1253.5,1254,1256,<br>1260,1271 | amide III (proteins)/<br>asymmetric<br>phosphate<br>stretching (nucleic<br>acids), CH <sub>2</sub> in-plane<br>deformation (lipids),<br>Triglycerides (fatty<br>acids) | B16F10(melanoma<br>cell), RBC<br>PC-9, H1975,<br>HCC827(lung cancer<br>cells)<br>NL-20, BEAS-20,<br>L929(lung normal cells)<br>SKOV-3(ovarian cancer<br>cell)<br>MDA-MB-231(breast<br>cancer cell) | EVs with Au@AgNPs <sup>1</sup><br>EVs coated with AuNP <sup>2</sup><br>Au nanopyramid<br>hybrid substrate <sup>10</sup><br>Ag NCs on Au NR array<br>substrate <sup>4</sup><br>3D plasmonic<br>nanobowl platform <sup>6</sup><br>GO-GNS mixed-<br>dimensional substrate <sup>9</sup> |
| 1278                                | ribonucleic acid<br>from Cytosine                                                                                                                                      | CCD841-CoN(normal<br>cell),<br>HCT116(Colon cancer<br>cell)                                                                                                                                        | Super-hydrophobic<br>substrate <sup>11</sup>                                                                                                                                                                                                                                        |
| 1287,1290,1293,1295                 | CH <sub>2</sub> ,CH <sub>3</sub><br><br>deformation/C-N<br><br>stretching + N-H<br><br>deformation; amide<br>III in proteins                                           | SKOV-3(ovarian cancer<br>cell)<br>B16F10(melanoma<br>cell)<br>PANC1(Pancreatic<br>cancer cell)                                                                                                     | biosilica/AgNP<br>composite substrates <sup>7</sup><br>EVs coated with AuNP <sup>2</sup><br>EVs with nanostars <sup>8</sup>                                                                                                                                                         |

|                      |                                                                                                                                |                                                                                       |                                                                                                                                                                     |
|----------------------|--------------------------------------------------------------------------------------------------------------------------------|---------------------------------------------------------------------------------------|---------------------------------------------------------------------------------------------------------------------------------------------------------------------|
| 1303,1307,<br>1309.3 | C–N asymmetric stretching (protein)/CH <sub>3</sub> CH <sub>2</sub> twisting (lipid)                                           | SKOV-3(ovarian cancer cell)<br>B16F10(melanoma cell), RBC<br>H1975(lung cancer cell)  | 3D plasmonic nanobowl platform <sup>6</sup><br>EVs with Au@AgNPs <sup>1</sup><br>EVs coated with AuNP <sup>2</sup><br>Au nanopyramid hybrid substrate <sup>10</sup> |
| 1310-1340            | carbohydrate-related SERS vibrations                                                                                           | SKOV-3(ovarian cancer cell)                                                           | biosilica/AgNP composite substrates <sup>7</sup>                                                                                                                    |
| 1310,1313            | Trp, C $\alpha$ -H                                                                                                             | Lung cancer cell, HPAEpiC(normal cells)                                               | GNP substrates <sup>5</sup>                                                                                                                                         |
| 1326                 | $\omega$ CH <sub>3</sub> CH <sub>2</sub> twisting (nucleic acids)                                                              | B16F10(melanoma cell), RBC                                                            | EVs with Au@AgNPs <sup>1</sup><br>EVs coated with AuNP <sup>2</sup>                                                                                                 |
| 1330                 | Phospholipid                                                                                                                   | SKOV-3(ovarian cancer cell)                                                           | 3D plasmonic nanobowl platform <sup>6</sup>                                                                                                                         |
| 1334                 | Ring breathing of adenine                                                                                                      | PANC1(Pancreatic cancer cell)                                                         | EVs with nanostars <sup>8</sup>                                                                                                                                     |
| 1336                 | backbone deformation C $\alpha$ – H/C $\alpha$ – C stretching/CH <sub>2</sub> ,CH <sub>3</sub> twisting or wagging in proteins | SKOV-3(ovarian cancer cell)                                                           | biosilica/AgNP composite substrates <sup>7</sup>                                                                                                                    |
| 1354                 | Guanine (nucleic acid)                                                                                                         | B16F10(melanoma cell)                                                                 | EVs coated with AuNP <sup>2</sup>                                                                                                                                   |
| 1360,1367,<br>1369.6 | CH <sub>3</sub> /CH <sub>2</sub> twisting or bending mode of lipid/collagen                                                    | SKOV-3(ovarian cancer cell)<br>B16F10(melanoma cell), RBC<br>HCC827(lung cancer cell) | biosilica/AgNP composite substrates <sup>7</sup><br>EVs coated with AuNP <sup>2</sup><br>Au nanopyramid hybrid substrate <sup>10</sup>                              |
| 1370,1378            | Carbohydrate                                                                                                                   | B16F10(melanoma cell), RBC<br>HCC827(lung cancer cell)                                | EVs coated with AuNP <sup>2</sup><br>Ag NCs on Au NR array substrate <sup>4</sup>                                                                                   |
| 1375,1376            | Amide III                                                                                                                      | Lung cancer cell, HPAEpiC(normal cells)                                               | GNP substrates <sup>5</sup>                                                                                                                                         |
| 1378                 | Lipid                                                                                                                          | SKOV-3(ovarian cancer cell)                                                           | 3D plasmonic nanobowl platform <sup>6</sup>                                                                                                                         |
| 1381                 | $\delta$ CH <sub>3</sub> symmetric (lipids)                                                                                    | B16F10(melanoma cell), RBC                                                            | EVs with Au@AgNPs <sup>1</sup><br>EVs coated with AuNP <sup>2</sup>                                                                                                 |



|                           |                                                                                                  |                                                                                                                        |                                                                                                                                                                          |
|---------------------------|--------------------------------------------------------------------------------------------------|------------------------------------------------------------------------------------------------------------------------|--------------------------------------------------------------------------------------------------------------------------------------------------------------------------|
| 1381                      | C=O symmetric stretching, CH <sub>2</sub> deformation, N – H in plane deformation (e.g. protein) | PANC1(Pancreatic cancer cell)                                                                                          | EVs with nanostars <sup>8</sup>                                                                                                                                          |
| 1386-1390                 | symmetrical CH <sub>3</sub> deformation in DNA/RNA, proteins, or lipids                          | SKOV-3(ovarian cancer cell)                                                                                            | biosilica/AgNP composite substrates <sup>7</sup>                                                                                                                         |
| 1388                      | DNA peak due to NH in-plane deformation                                                          | SK-BR3(breast cancer cell)                                                                                             | GO-GNS mixed-dimensional substrate <sup>9</sup>                                                                                                                          |
| 1394,1404                 | CH rocking                                                                                       | SKOV-3(ovarian cancer cell)<br>NL-20, BEAS-20, L929(lung normal cells)                                                 | 3D plasmonic nanobowl platform <sup>6</sup><br>Ag NCs on Au NR array substrate <sup>4</sup>                                                                              |
| 1400                      | protein vibrational modes, e.g., CH <sub>2</sub> deformations                                    | SKOV-3(ovarian cancer cell)                                                                                            | biosilica/AgNP composite substrates <sup>7</sup>                                                                                                                         |
| 1416,1422                 | DNA bases                                                                                        | HPAEpiC(normal cell)<br>H1975(lung cancer cell)                                                                        | GNP substrates <sup>5</sup><br>Au nanopyramid hybrid substrate <sup>10</sup>                                                                                             |
| 1440                      | Lipid                                                                                            | SKOV-3(ovarian cancer cell)                                                                                            | 3D plasmonic nanobowl platform <sup>6</sup>                                                                                                                              |
| 1443,1445,1460, 1448,1449 | CH <sub>2</sub> , CH <sub>3</sub> deformation (e.g. protein backbone, acyl chain in lipids)      | B16F10(melanoma cell), RBC<br>SKOV-3(ovarian cancer cell)<br>HCC827(lung cancer cell)<br>PANC1(Pancreatic cancer cell) | EVs coated with AuNP <sup>2</sup><br>biosilica/AgNP composite substrates <sup>7</sup><br>Ag NCs on Au NR array substrate <sup>4</sup><br>EVs with nanostars <sup>8</sup> |
| 1465,1466                 | lipids                                                                                           | B16F10(melanoma cell), RBC<br>SKOV-3(ovarian cancer cell)                                                              | EVs with Au@AgNPs <sup>1</sup><br>EVs coated with AuNP <sup>2</sup><br>3D plasmonic nanobowl platform <sup>6</sup>                                                       |
| 1466,1470,1480            | overlapping of the CH deformation occurring in both lipids and proteins                          | Lung cancer cell<br>CCD841-CoN,<br>HPAEpiC(normal cells)<br>HCT116(Colon cancer cell)                                  | GNP substrates <sup>5</sup><br>Super-hydrophobic substrate <sup>11</sup>                                                                                                 |
| 1474.8,1481               | Amide II (largely due to coupling of CN                                                          | H1975, HCC827(lung cancer cells)                                                                                       | Au nanopyramid hybrid substrate <sup>10</sup>                                                                                                                            |

|                |                                                                              |                                                                                                       |                                                                                                                                                   |
|----------------|------------------------------------------------------------------------------|-------------------------------------------------------------------------------------------------------|---------------------------------------------------------------------------------------------------------------------------------------------------|
|                | stretching & in-plane bending of N-H group                                   |                                                                                                       |                                                                                                                                                   |
| 1477           | DMAP + $\delta$ (C-H) (e.g., lipid, protein)                                 | B16F10(melanoma cell), RBC                                                                            | EVs coated with AuNP <sup>2</sup>                                                                                                                 |
| 1490           | DNA                                                                          | B16F10(melanoma cell), RBC                                                                            | EVs with Au@AgNPs <sup>1</sup>                                                                                                                    |
| 1500           | conjugated $\nu$ -C=C- vibrations in nucleic acids                           | SKOV-3(ovarian cancer cell)                                                                           | biosilica/AgNP composite substrates <sup>7</sup>                                                                                                  |
| 1506.6         | N=H bending, Cytosine                                                        | HCC827(lung cancer cell)                                                                              | Au nanopyramid hybrid substrate <sup>10</sup>                                                                                                     |
| 1510           | DNA peak due to purine A, G ring                                             | MDA-MB-231(breast cancer cell)                                                                        | GO-GNS mixed-dimensional substrate <sup>9</sup>                                                                                                   |
| 1528           | $\nu$ (C-C) conjugated                                                       | B16F10(melanoma cell), RBC                                                                            | EVs coated with AuNP <sup>2</sup>                                                                                                                 |
| 1539           | Cytosine                                                                     | H1299, H522(lung cancer cells)                                                                        | GNP substrates <sup>3</sup>                                                                                                                       |
| 1542,1545      | amide II (proteins)                                                          | B16F10(melanoma cell), RBC<br>SKOV-3(ovarian cancer cell)                                             | EVs with Au@AgNPs <sup>1</sup><br>biosilica/AgNP composite substrates <sup>7</sup>                                                                |
| 1545           | lipid band due to $\delta$ (CH <sub>3</sub> ,CH <sub>2</sub> ) in acyl chain | MDA-MB-231(breast cancer cell)                                                                        | GO-GNS mixed-dimensional substrate <sup>9</sup>                                                                                                   |
| 1552,1563,1588 | Trp                                                                          | SKOV-3(ovarian cancer cell)<br>B16F10(melanoma cell), RBC<br>Lung cancer cell<br>HPAEpiC(normal cell) | 3D plasmonic nanobowl platform <sup>6</sup><br>EVs with Au@AgNPs <sup>1</sup><br>EVs coated with AuNP <sup>2</sup><br>GNP substrates <sup>5</sup> |
| 1576           | Guanine (nucleic acid)                                                       | B16F10(melanoma cell), RBC                                                                            | EVs coated with AuNP <sup>2</sup>                                                                                                                 |
| 1584.8         | Hydroxyproline                                                               | HCC827(lung cancer cell)                                                                              | Au nanopyramid hybrid substrate <sup>10</sup>                                                                                                     |
| 1590,1590.9    | C-C ring vibration in aromatic groups                                        | SKOV-3(ovarian cancer cell)<br>H1975(lung cancer cell)                                                | biosilica/AgNP composite substrates <sup>7</sup><br>Au nanopyramid hybrid substrate <sup>10</sup>                                                 |
| 1595           | nucleic acid                                                                 | H1975(lung cancer cell)<br>SKOV-3(ovarian cancer cell)                                                | Ag NCs on Au NR array substrate <sup>4</sup><br>biosilica/AgNP composite substrates <sup>7</sup>                                                  |

|                            |                                                                                                                    |                                                                                               |                                                                                                                                                                                                                          |
|----------------------------|--------------------------------------------------------------------------------------------------------------------|-----------------------------------------------------------------------------------------------|--------------------------------------------------------------------------------------------------------------------------------------------------------------------------------------------------------------------------|
| 1600                       | Phe                                                                                                                | SKOV-3(ovarian cancer cell)                                                                   | 3D plasmonic nanobowl platform <sup>6</sup>                                                                                                                                                                              |
| 1605                       | lipid band due to the ergosterol                                                                                   | MDA-MB-231(breast cancer cell)                                                                | GO-GNS mixed-dimensional substrate <sup>9</sup>                                                                                                                                                                          |
| 1605.9,1608,1614,1618,1620 | Cytosine (NH <sub>2</sub> ), Ring C-C stretch of phenyl (1), Phenylalanine, tyrosine, vibration of C = C (protein) | H1975, HCC827(lung cancer cells)<br>B16F10(melanoma cell), RBC<br>SKOV-3(ovarian cancer cell) | Au nanopyramid hybrid substrate <sup>10</sup><br>EVs coated with AuNP <sup>2</sup><br>Ag NCs on Au NR array substrate <sup>4</sup><br>EVs with Au@AgNPs <sup>1</sup><br>biosilica/AgNP composite substrates <sup>7</sup> |
| 1622                       | Amide I, Tyr, Trp, Phe                                                                                             | Lung cancer cell<br>HPAEpiC(normal cell)                                                      | GNP substrates <sup>5</sup>                                                                                                                                                                                              |
| 1630                       | tryptophan due to -C=O stretch                                                                                     | SK-BR3(breast cancer cell)                                                                    | GO-GNS mixed-dimensional substrate <sup>9</sup>                                                                                                                                                                          |
| 1630                       | amide I C=O stretching vibrations in proteins                                                                      | SKOV-3(ovarian cancer cell)                                                                   | biosilica/AgNP composite substrates <sup>7</sup>                                                                                                                                                                         |
| 1630                       | Amide I (random coils of proteins)                                                                                 | normal cell(alveolar cell)                                                                    | GNP substrates <sup>3</sup>                                                                                                                                                                                              |
| 1632                       | amide I $\alpha$ -helix and $\beta$ structure (proteins)                                                           | B16F10(melanoma cell), RBC                                                                    | EVs with Au@AgNPs <sup>1</sup>                                                                                                                                                                                           |
| 1650                       | amide I vibrations in proteins or C=C stretching in lipids                                                         | SKOV-3(ovarian cancer cell)                                                                   | biosilica/AgNP composite substrates <sup>7</sup>                                                                                                                                                                         |
| 1664                       | amide I (proteins)/DNA                                                                                             | B16F10(melanoma cell), RBC                                                                    | EVs with Au@AgNPs <sup>1</sup>                                                                                                                                                                                           |
| 1687                       | Amide I                                                                                                            | Lung cancer cell                                                                              | GNP substrates <sup>5</sup>                                                                                                                                                                                              |

**Table S2.** peak assignments of surface-enhanced Raman spectroscopy of plasma/serum-derived EVs

| Peak(cm <sup>-1</sup> ) | Origin                                          | EVs source                                                                                                                                  | Substrates                                                                                             |
|-------------------------|-------------------------------------------------|---------------------------------------------------------------------------------------------------------------------------------------------|--------------------------------------------------------------------------------------------------------|
| 502,504                 | S-S disulfide bridge in cysteine                | Lung cancer patients, healthy volunteers                                                                                                    | GNP substrates <sup>5</sup>                                                                            |
| 651                     | Tyr                                             | Lung cancer patients, healthy volunteers                                                                                                    | GNP substrates <sup>5</sup>                                                                            |
| 734                     | Met, Adenine                                    | Lung cancer patients, healthy volunteers                                                                                                    | GNP substrates <sup>5</sup>                                                                            |
| 787                     | Nucleic Acids                                   | Multiple myeloma(MM)patients, monoclonal gammopathy of uncertain significance (MGUS) patients                                               | Microstructured arrays containing AuNPs <sup>12</sup>                                                  |
| 830                     | C-O-O                                           | healthy volunteers, pancreatic cancer patients                                                                                              | APS-mica <sup>13</sup>                                                                                 |
| 850-860                 | Polysaccharide Structure                        | Multiple myeloma(MM)patients, monoclonal gammopathy of uncertain significance (MGUS) patients                                               | Microstructured arrays containing AuNPs <sup>12</sup>                                                  |
| 864.1                   | Ribose vibration, one of the distinct RNA modes | healthy volunteers                                                                                                                          | Au nanopyramid hybrid substrate <sup>10</sup>                                                          |
| 1003,1008, 1047         | Phe                                             | healthy volunteers<br>Multiple myeloma(MM)patients, monoclonal gammopathy of uncertain significance (MGUS) patients<br>Lung cancer patients | Microstructured arrays containing AuNPs <sup>12</sup><br>GNP substrates <sup>5</sup>                   |
| 1032                    | Phospholipid and/or Polysaccharide              | Multiple myeloma(MM)patients, monoclonal gammopathy of uncertain significance (MGUS) patients                                               | Microstructured arrays containing AuNPs <sup>12</sup>                                                  |
| 1051,1063.9, 1077,1124  | C-C skeletal stretching                         | healthy volunteers, pancreatic cancer patients<br>Lung cancer patients                                                                      | APS-mica <sup>13</sup><br>Au nanopyramid hybrid substrate <sup>10</sup><br>GNP substrates <sup>5</sup> |
| 1128                    | Proteins and/or Ceramides                       | Multiple myeloma(MM)patients, monoclonal gammopathy of uncertain significance                                                               | Microstructured arrays containing AuNPs <sup>12</sup>                                                  |

---

| (MGUS) patients |                                                             |                                                                                                                                 |                                                                                                              |
|-----------------|-------------------------------------------------------------|---------------------------------------------------------------------------------------------------------------------------------|--------------------------------------------------------------------------------------------------------------|
| 1135            | C-N                                                         | healthy volunteers                                                                                                              | GNP substrates <sup>5</sup>                                                                                  |
| 1151            | Lipids and nucleic acids<br>(cytosine, guanine,<br>adenine) | Lung cancer patients                                                                                                            | GNP substrates <sup>5</sup>                                                                                  |
| 1157            | $\beta$ -Carotene<br>Accumulation                           | Multiple<br>myeloma(MM)patients,<br>monoclonal gammopathy<br>of uncertain significance<br>(MGUS) patients                       | Microstructured arrays<br>containing AuNPs <sup>12</sup>                                                     |
| 1170.4          | C-H in-plane bending<br>mode of tyrosine                    | healthy volunteers                                                                                                              | Au nanopyramid hybrid<br>substrate <sup>10</sup>                                                             |
| 1173            | Lipids and nucleic acids<br>(cytosine, guanine,<br>adenine) | healthy volunteers                                                                                                              | GNP substrates <sup>5</sup>                                                                                  |
| 1209            | Tryptophan and/or<br>Phenylalanine                          | Multiple<br>myeloma(MM)patients,<br>monoclonal gammopathy<br>of uncertain significance<br>(MGUS) patients                       | Microstructured arrays<br>containing AuNPs <sup>12</sup>                                                     |
| 1255.6          | Lipids                                                      | healthy volunteers                                                                                                              | Au nanopyramid hybrid<br>substrate <sup>10</sup>                                                             |
| 1302.9          | Amide III (protein)                                         | healthy volunteers                                                                                                              | Au nanopyramid hybrid<br>substrate <sup>10</sup>                                                             |
| 1316,1316.1     | Nucleic Acids and/or<br>Collagen and/or Guanine             | Multiple<br>myeloma(MM)patients,<br>monoclonal gammopathy<br>of uncertain significance<br>(MGUS) patients<br>healthy volunteers | Microstructured arrays<br>containing AuNPs <sup>12</sup><br>Au nanopyramid hybrid<br>substrate <sup>10</sup> |
| 1345.7          | CH <sub>3</sub> , CH <sub>2</sub> wagging                   | healthy volunteers                                                                                                              | Au nanopyramid hybrid<br>substrate <sup>10</sup>                                                             |
| 1373.3          | T, A, G (ring breathing<br>modes of the DNA/RNA<br>bases)   | healthy volunteers                                                                                                              | Au nanopyramid hybrid<br>substrate <sup>10</sup>                                                             |
| 1376            | Amide III                                                   | Lung cancer patients                                                                                                            | GNP substrates <sup>5</sup>                                                                                  |
| 1378            | Carbohydrate and/or<br>Nucleic Acids                        | Multiple<br>myeloma(MM)patients,<br>monoclonal gammopathy<br>of uncertain significance<br>(MGUS) patients                       | Microstructured arrays<br>containing AuNPs <sup>12</sup>                                                     |
| 1386.2,1402     | CH <sub>3</sub> band                                        | healthy volunteers                                                                                                              | Au nanopyramid hybrid<br>substrate <sup>10</sup>                                                             |

---

---

|           |                                                |                                                                                                           |                                                          |
|-----------|------------------------------------------------|-----------------------------------------------------------------------------------------------------------|----------------------------------------------------------|
|           |                                                |                                                                                                           | GNP substrates <sup>5</sup>                              |
| 1420      | DNA bases                                      | Lung cancer patients                                                                                      | GNP substrates <sup>5</sup>                              |
| 1427.2    | Deoxyribose (B,Z-<br>marker)                   | healthy volunteers                                                                                        | Au nanopyramid hybrid<br>substrate <sup>10</sup>         |
| 1450      | CH2 bending                                    | healthy volunteers,<br>pancreatic cancer patients                                                         | APS-mica <sup>13</sup>                                   |
| 1457      | Deoxyribose                                    | healthy volunteers                                                                                        | Au nanopyramid hybrid<br>substrate <sup>10</sup>         |
| 1459      | C-H                                            | Lung cancer<br>patients, healthy<br>volunteers                                                            | GNP substrates <sup>5</sup>                              |
| 1479.6    | Amide II                                       | healthy volunteers                                                                                        | Au nanopyramid hybrid<br>substrate <sup>10</sup>         |
| 1515.8    | Cytosine                                       | healthy volunteers                                                                                        | Au nanopyramid hybrid<br>substrate <sup>10</sup>         |
| 1539      | Nucleic Acids                                  | Multiple<br>myeloma(MM)patients,<br>monoclonal gammopathy<br>of uncertain significance<br>(MGUS) patients | Microstructured arrays<br>containing AuNPs <sup>12</sup> |
| 1589      | Phenylalanine,<br>hydroxyproline               | healthy volunteers                                                                                        | Au nanopyramid hybrid<br>substrate <sup>10</sup>         |
| 1655.2    | Amide I of proteins                            | healthy volunteers                                                                                        | Au nanopyramid hybrid<br>substrate <sup>10</sup>         |
| 1672      | Ceramide                                       | Multiple<br>myeloma(MM)patients,<br>monoclonal gammopathy<br>of uncertain significance<br>(MGUS) patients | Microstructured arrays<br>containing AuNPs <sup>12</sup> |
| 869,872   | Tyr                                            | Lung cancer patients,<br>healthy volunteers                                                               | GNP substrates <sup>5</sup>                              |
| 980,981   | Trp, Val                                       | Lung cancer<br>patients, healthy<br>volunteers                                                            | GNP substrates <sup>5</sup>                              |
| 1235-1285 | Proteins and/or Nucleic<br>Acids and/or Lipids | Multiple<br>myeloma(MM)patients,<br>monoclonal gammopathy<br>of uncertain significance<br>(MGUS) patients | Microstructured arrays<br>containing AuNPs <sup>12</sup> |
| 1296,1301 | Amide III—collagen                             | Lung cancer<br>patients, healthy<br>volunteers                                                            | GNP substrates <sup>5</sup>                              |
| 1300-1400 | CH2 twisting                                   | healthy volunteers,                                                                                       | APS-mica <sup>13</sup>                                   |

---

---

| pancreatic cancer patients |                                                                                                  |                                                                                               |                                                       |
|----------------------------|--------------------------------------------------------------------------------------------------|-----------------------------------------------------------------------------------------------|-------------------------------------------------------|
| 1335-1345                  | Nucleic Acids (Purine Bases) and/or Tryptophan and/or Glycine Backbone and/or Proline Side Chain | Multiple myeloma(MM)patients, monoclonal gammopathy of uncertain significance (MGUS) patients | Microstructured arrays containing AuNPs <sup>12</sup> |
| 1440-1450                  | Proteins and/or Lipids                                                                           | Multiple myeloma(MM)patients, monoclonal gammopathy of uncertain significance (MGUS) patients | Microstructured arrays containing AuNPs <sup>12</sup> |
| 1490-1500                  | Nucleic Acids                                                                                    | Multiple myeloma(MM)patients, monoclonal gammopathy of uncertain significance (MGUS) patients | Microstructured arrays containing AuNPs <sup>12</sup> |
| 1560-1580                  | Tryptophan and/or Nucleic Acids and/or Proteins and/or Carbohydrates                             | Multiple myeloma(MM)patients, monoclonal gammopathy of uncertain significance (MGUS) patients | Microstructured arrays containing AuNPs <sup>12</sup> |
| 1593,1596                  | Phe                                                                                              | Lung cancer patients, healthy volunteers                                                      | GNP substrates <sup>5</sup>                           |

---

**Table3.** Statistical classification method of the Raman spectra

| Method           | Samples                                                                       | Sensitivity   | Specificity  | Ref.          |
|------------------|-------------------------------------------------------------------------------|---------------|--------------|---------------|
| PCA              | Normal cell and lung cancer cell                                              | 95.3%, 91.67% | 97.3%, 100%  | <sup>3</sup>  |
|                  | Breast cancer cell                                                            | 100%          | 100%         | <sup>14</sup> |
|                  | Ovarian cell and endometrial cancer cell                                      | 100%          | 99.2%        | <sup>7</sup>  |
|                  | 6 volunteers and<br>14 breast cancer patients                                 | 91.67%        | 100%         | <sup>14</sup> |
| PCA-LDA          | Pancreatic cancer cell and prostate cancer<br>cell and colorectal cancer cell | 100%.         | 100%.        | <sup>8</sup>  |
| PC-DFA           | Normal cell and lung cancer cell                                              | 90.6%         | 97.1%        | <sup>13</sup> |
| PLS-DA           | Normal cell and melanoma cell                                                 | 92.0%, 95.1%  | 96.9%, 100%  | <sup>2</sup>  |
|                  | Red blood cell and melanoma cell                                              | 91.7%, 96.9%  | 96.9%, 91.7% | <sup>1</sup>  |
|                  | 10 volunteers and<br>10 osteosarcoma patients                                 | 86%,          | 100%         | <sup>15</sup> |
| Deep<br>learning | 10 volunteers and<br>43 Lung cancer patients                                  | 84%           | 85%          | <sup>5</sup>  |

## References

1. J. C. Fraire, S. Stremersch, D. Bouckaert, T. Monteyne, T. De Beer, P. Wuytens, R. De Rycke, A. G. Skirtach, K. Raemdonck, S. De Smedt and K. Braeckmans, *ACS Appl Mater Interfaces*, 2019, **11**, 39424-39435.
2. S. Stremersch, M. Marro, B. E. Pinchasik, P. Baatsen, A. Hendrix, S. C. De Smedt, P. Loza-Alvarez, A. G. Skirtach, K. Raemdonck and K. Braeckmans, *Small*, 2016, **12**, 3292-3301.
3. J. Park and M. Hwang, 2017.
4. K. Sivashanmugan, W.-L. Huang, C.-H. Lin, J.-D. Liao, C.-C. Lin, W.-C. Su and T.-C. Wen, *Journal of the Taiwan Institute of Chemical Engineers*, 2017, **80**, 149-155.
5. H. Shin, S. Oh, S. Hong, M. Kang, D. Kang, Y. G. Ji, B. H. Choi, K. W. Kang, H. Jeong, Y. Park, S. Hong, H. K. Kim and Y. Choi, *ACS Nano*, 2020, **14**, 5435-5444.
6. C. Lee, R. P. Carney, S. Hazari, Z. J. Smith, A. Knudson, C. S. Robertson, K. S. Lam and S. Wachsmann-Hogiu, *Nanoscale*, 2015, **7**, 9290-9297.
7. T. Rojalín, H. J. Koster, J. Liu, R. R. Mizenko, D. Tran, S. Wachsmann-Hogiu and R. P. Carney, *ACS Sens*, 2020, **5**, 2820-2833.
8. Y. Liu, W. Zhang, T. H. Phan, W. Chrzanowski, A. Rodger and Y. Wang, *Anal Methods*, 2020, **12**, 5908-5915.
9. A. Pramanik, J. Mayer, S. Patibandla, K. Gates, Y. Gao, D. Davis, R. Seshadri and P. C. Ray, *ACS Omega*, 2020, **5**, 16602-16611.
10. Z. Yan, S. Dutta, Z. Liu, X. Yu, N. Mesgarzadeh, F. Ji, G. Bitan and Y. H. Xie, *ACS Sens*, 2019, **4**, 488-497.
11. L. Tirinato, F. Gentile, D. Di Mascolo, M. L. Coluccio, G. Das, C. Liberale, S. A. Pullano, G. Perozziello, M. Francardi, A. Accardo, F. De Angelis, P. Candeloro and E. Di Fabrizio, *Microelectronic Engineering*, 2012, **97**, 337-340.
12. M. Russo, L. Tirinato, F. Scionti, M. L. Coluccio, G. Perozziello, C. Riillo, V. Mollace, S. Gratteri, N. Malara, M. T. Di Martino, G. Viglietto, P. Tagliaferri, P. Tassone, M. Rossi and P. Candeloro, *ACS Omega*, 2020, **5**, 30436-30443.
13. J. Carmicheal, C. Hayashi, X. Huang, L. Liu, Y. Lu, A. Krasnoslobodtsev, A. Lushnikov, P. G. Kshirsagar, A.



- Patel, M. Jain, Y. L. Lyubchenko, Y. Lu, S. K. Batra and S. Kaur, *Nanomedicine*, 2019, **16**, 88-96.
14. G. Li, N. Zhu, J. Zhou, K. Kang, X. Zhou, B. Ying, Q. Yi and Y. Wu, *J Mater Chem B*, 2021, **9**, 2709-2716.
15. Z. Han, J. Yi, Y. Yang, D. Li, C. Peng, S. Long, X. Peng, Y. Shen, B. Liu and L. Qiao, *Analyst*, 2021, **146**, 6496-6505.
